# Supplementary material for: Mamestra brassicae Multiple Nucleopolyhedroviruses Prevents Pupation of Helicoverpa armigera by Regulating Juvenile Hormone Titer
Source: MDPI journal article supplement (doi:10.3390/insects15030202), 2024-03-18
Supplement: s1 [file s1]

**Table S1.** Primers used for real-time PCR.

| Names                 | Sequences (5'–3')      |
|-----------------------|------------------------|
| MbMNPV poly-F         | CGTAAACTGGAGCGGTAAAG   |
| MbMNPV poly-R         | GACTTCGTGGGGCACATAG    |
| Hear $\beta$ -actin-F | CACCGCTGAGAGGGAAATC    |
| Hear $\beta$ -actin-R | CATACCCAGGAAGGAAGGC    |
| JHE-F                 | GAATACGACAAAAATCCCCG   |
| JHE-R                 | CCTGTTCCGCTCATCAAAAT   |
| selenbp1-a-F          | CCTCCTTATCCTGCCTGCT    |
| selenbp1-a-R          | CGTCTTTATCTCCCATCGTCG  |
| bhmt-F                | CTTAGAGCGGGAGCAGATTT   |
| bhmt-R                | CACATAGTCCTGGTACTCCTCG |
| JHEH-F                | GTTTCCTTGTAAGCGGTG     |
| JHEH-R                | GCCTGATGCTCTGATCCTGT   |
| ACADSB-F              | ATGTTCCCATACGCCGC      |
| ACADSB-R              | CGCCAGTTTTCTGATTGTGTCT |

**Table S2.** Primers used for synthesizing dsRNA.

| Names      | Sequences (5'–3')                           |
|------------|---------------------------------------------|
| JHE-F-CDS  | AGGTGCCCCGACACCGACA                         |
| JHE-R-CDS  | CCGCTGAACCCTTAATAACAACA                     |
| JHEH-F-CDS | ATGGGTTTCCTTGTAAGCG                         |
| JHEH-R-CDS | GTCACAGTTCAGTCTTCTTGTCT                     |
| JHE-F-T7   | TAATACGACTCACTATAGGGGAATACGACAAAAATCCCCG    |
| JHE-R-T7   | TAATACGACTCACTATAGGGGACTCTTCAAATCCATCACTAGC |
| JHEH-F-T7  | TAATACGACTCACTATAGGGTGGTTGCCTTCAAGTGCT      |
| JHEH-R-T7  | TAATACGACTCACTATAGGGGCCGGTTCATCAGATTCC      |
| EGFP-F-T7  | TAATACGACTCACTATAGGGGTGCAGTGCTTCAGCCGCTA    |
| EGFP-R-T7  | TAATACGACTCACTATAGGGTCCATGCCGTGAGTGATCCC    |
